# Supplementary material for: Influence of the Mixtures of Vegetable Oil and Vitamin E over the Microstructure and Rheology of Organogels
Source: MDPI journal article supplement (doi:10.3390/gels8010036), 2022-01-05
Supplement: s1 [file s1]

Article

# Influence of the Mixtures of Vegetable Oil and Vitamin E over the Microstructure and Rheology of Organogels

Renata Miliani Martinez <sup>1,\*</sup>, Pedro Leonidas Oseliero Filho <sup>2</sup>, Barbara Bianca Gerbelli <sup>3</sup>, Wagner Vidal Magalhães <sup>4</sup>, Maria Valéria Robles Velasco <sup>1</sup>, Suzana Caetano da Silva Lannes <sup>5</sup>, Cristiano Luis Pinto de Oliveira <sup>6</sup>, Catarina Rosado <sup>7</sup> and André Rolim Baby <sup>1,\*</sup>

## Supplementary Materials

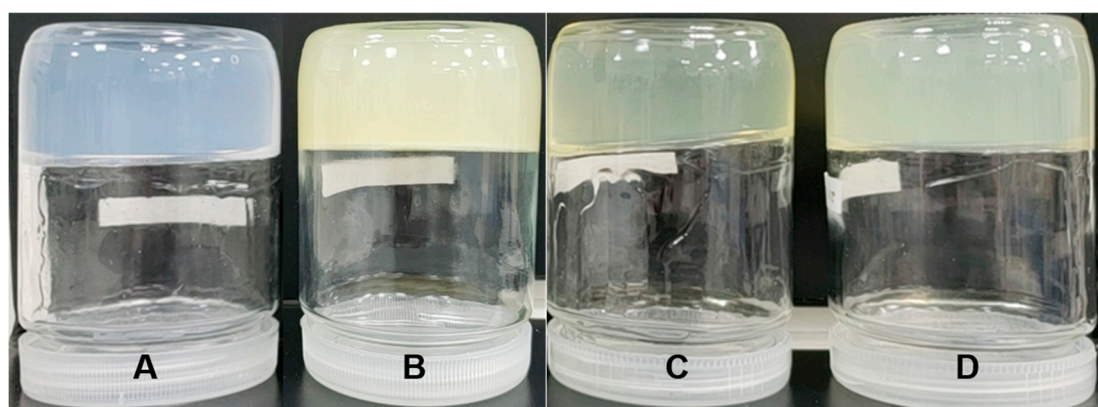

**Figure S1.** Macroscopic aspect of organogels. (A) 12HSA2:VO98, (B) 12HSA2:VO78:VE20, (C) CW2:VO98, (D) CW2:VO78:VE20.

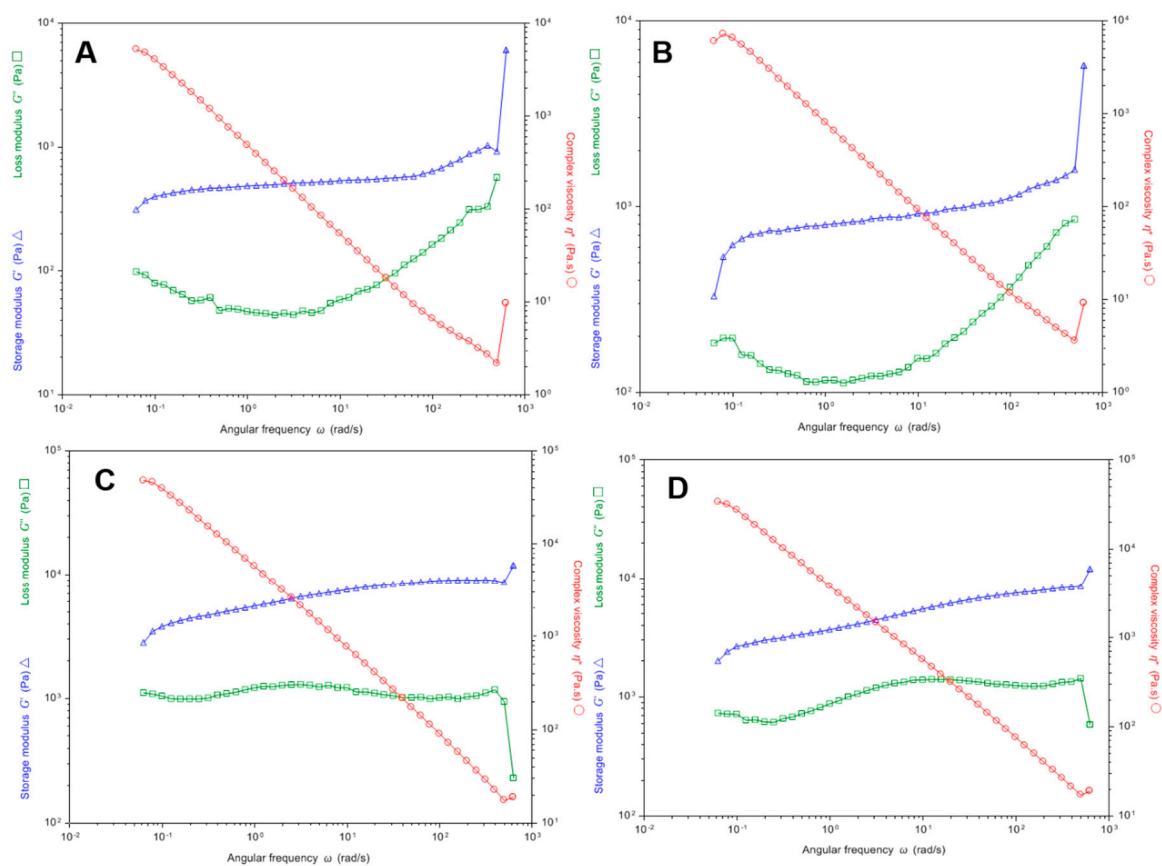

**Figure S2.** Frequency sweep test. (A) 12HSA2:VO96:VE2, (B) 12HSA2:VO78:VE20, (C) CW2:VO96:VE2, (D) CW2:VO78:VE20.
